# Supplementary material for: COVID-19 pneumothorax in the UK: a prospective observational study using the ISARIC WHO clinical characterisation protocol
Source: PubMed Central journal article supplement (PMC8186005; doi:10.1183/13993003.00929-2021), 2021-09-16

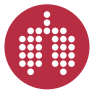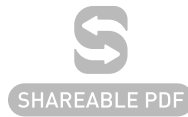

# COVID-19 pneumothorax in the UK: a prospective observational study using the ISARIC WHO clinical characterisation protocol

Stefan J. Marciniak <sup>1,2,3,13</sup>, James Farrell<sup>4,13</sup>, Anthony Rostron <sup>5,6,7</sup>, Ian Smith<sup>3</sup>,  
Peter J.M. Openshaw <sup>8</sup>, J. Kenneth Baillie <sup>9,10,11</sup>, Annemarie Docherty<sup>4</sup> and Malcolm G. Semple <sup>12</sup>

<sup>1</sup>CIMR, University of Cambridge, Cambridge, UK. <sup>2</sup>Addenbrooke's Hospital, Cambridge, UK. <sup>3</sup>Royal Papworth Hospital, Cambridge, UK. <sup>4</sup>Usher Institute of Population Health Sciences and Informatics, University of Edinburgh, Edinburgh, UK. <sup>5</sup>Integrated Critical Care Unit, Sunderland Royal Hospital, South Tyneside and Sunderland NHS Foundation Trust, Sunderland, UK. <sup>6</sup>Translational and Clinical Research Institute, Newcastle University, Newcastle upon Tyne, UK. <sup>7</sup>South Tyneside and Sunderland NHS Foundation Trust, Sunderland, UK. <sup>8</sup>Respiratory Medicine, Imperial College London, London, UK. <sup>9</sup>Roslin Institute, University of Edinburgh, Edinburgh, UK. <sup>10</sup>MRC Human Genetics Unit, University of Edinburgh, Edinburgh, UK. <sup>11</sup>Intensive Care Unit, Royal Infirmary of Edinburgh, Edinburgh, UK. <sup>12</sup>NIHR Health Protection Research Unit in Emerging and Zoonotic Infection Institute of Infection and Global Health, University of Liverpool, Liverpool, UK. <sup>13</sup>Joint first authors.

Stefan J. Marciniak ([sjm20@cam.ac.uk](mailto:sjm20@cam.ac.uk))

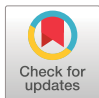

Shareable abstract (@ERSpublications)

**Population level data from 131 679 patients show that COVID-19 pneumothorax occurs in 0.97% of admitted patients, especially males and smokers, and is associated with increased mortality**  
<https://bit.ly/3oB27ez>

**Cite this article as:** Marciniak SJ, Farrell J, Rostron A, *et al.* COVID-19 pneumothorax in the UK: a prospective observational study using the ISARIC WHO clinical characterisation protocol. *Eur Respir J* 2021; 58: 2100929 [DOI: 10.1183/13993003.00929-2021].

This single-page version can be shared freely online.

Copyright ©The authors 2021.

This version is distributed under the terms of the Creative Commons Attribution Non-Commercial Licence 4.0. For commercial reproduction rights and permissions contact [permissions@ersnet.org](mailto:permissions@ersnet.org)

Received: 29 March 2021  
Accepted: 11 May 2021

*To the Editor:*

Pneumothorax is an important complication of coronavirus disease 2019 (COVID-19) [1, 2]. Based on a series of 60 individuals, we previously estimated that 0.91% of people admitted to hospital with COVID-19 develop pneumothorax [1]. Males accounted for three quarters of those affected, and patients requiring noninvasive or invasive ventilatory support appeared at elevated risk. In a separate series of ventilated patients with COVID-19, barotrauma, defined as pneumothorax or pneumomediastinum, was found to be an independent risk for death [2]. During the pandemic, treatment strategies have evolved, influenced by large randomised controlled trials and clinical experience. Following the landmark results from the RECOVERY trial [3], dexamethasone became standard of care for patients requiring supplemental oxygen. Following the first UK wave between March and June 2020, use of noninvasive respiratory support became more common [4, 5]. Such changes could plausibly alter the incidence of pneumothorax caused by COVID-19. Indeed, a recent small study reported an increase in pneumothoraces in the second wave of COVID-19 in Italy, leading to speculation that dexamethasone use might have been causal [6].

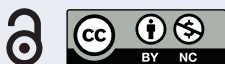

Supplement: ERJ-00929-2021.Shareable.pdf [file ERJ-00929-2021.Shareable.pdf]
